# Supplementary material for: High Temporal Resolution Dual-Source Photon-Counting CT for Coronary Artery Disease: Initial Multicenter Clinical Experience
Source: MDPI journal article supplement (doi:10.3390/jcm11206003), 2022-10-11
Supplement: s1 [file s1]

**Table S1a. High Pitch Mode**

| Linear Regression  | Image Quality |                |
|--------------------|---------------|----------------|
|                    | $\beta$       | <i>p-value</i> |
| Male Gender        | -0.033        | 0.862          |
| Age (per 10 years) | -0.432        | 0.055          |
| BMI                | -0.048        | 0.794          |
| Heart Rate         | 0.378         | 0.074          |
| HR Variability     | 0.613         | 0.007          |
| Agatston-Score     | 0.211         | 0.298          |

Multiple linear regression; p-value model = 0.012.

**Table S1b. Sequential and Low Pitch Mode**

| Linear Regression  | Image Quality |         |
|--------------------|---------------|---------|
|                    | $\beta$       | p-Value |
| Male Gender        | 0.225         | 0.195   |
| Age (per 10 years) | -0.107        | 0.541   |
| BMI                | 0.316         | 0.092   |
| Heart Rate         | 0.220         | 0.214   |
| HR Variability     | -0.123        | 0.459   |
| Agatston-Score     | 0.226         | 0.237   |

Multiple linear regression, p-value model = 0.149.
